# Supplementary material for: Serum selenium, selenoprotein P and glutathione peroxidase 3 as predictors of mortality and recurrence following breast cancer diagnosis: A multicentre cohort study
Source: PubMed Central journal article supplement — Redox Biol. 2021 Sep 21;47:102145. doi: 10.1016/j.redox.2021.102145 (PMC8476451; doi:10.1016/j.redox.2021.102145), 2021-09-21
Supplement: mmc1.pdf [file mmc1.pdf]

# **Serum selenium, selenoprotein P levels and glutathione peroxidase 3 activity as predictors of mortality and recurrence following breast cancer: a multicentre cohort study**

Kamil Demircan<sup>a,b</sup>, Ylva Bengtsson<sup>c</sup>, Qian Sun<sup>a</sup>, Annie Brange<sup>c</sup>, Johan Vallon-Christersson<sup>d</sup>, Eddy Rijntjes<sup>a</sup>, Martin Malmberg<sup>e</sup>, Lao H Saal<sup>d</sup>, Lisa Rydén<sup>c</sup>, Åke Borg<sup>d</sup>, Jonas Manjer<sup>c</sup> and Lutz Schomburg<sup>a,\*</sup>

<sup>a</sup> Institute for Experimental Endocrinology, Charité-Universitätsmedizin Berlin, corporate member of Freie Universität Berlin, Humboldt-Universität zu Berlin, and Berlin Institute of Health, Berlin, Germany

<sup>b</sup> Berlin Institute of Health (BIH), Biomedical Innovation Academy (BIA), Berlin, Germany.

<sup>c</sup> Department of Surgery, Skåne University Hospital Malmö, Lund University, Malmö, Sweden.

<sup>d</sup> Division of Oncology, Department of Clinical Sciences Lund, Lund University, Lund, Sweden.

<sup>e</sup> Department of Oncology, Skåne University Hospital, Lund, Sweden.

\* Correspondence to: Lutz Schomburg  
Institute for Experimental Endocrinology  
Hessische Str. 3-4,  
Charité – Universitätsmedizin  
10115 Berlin, Germany  
[lutz.schomburg@charite.de](mailto:lutz.schomburg@charite.de)

## **Supplementary Material**

**Supplementary Table 1** Se biomarkers in relation to tumour characteristics

| Characteristic           | Selenium Q       |                  |                  |                  |                  | Selenoprotein P Q |                  |                  |                  |                  | Glutathione Peroxidase 3 Q |                  |                  |                  |                  |
|--------------------------|------------------|------------------|------------------|------------------|------------------|-------------------|------------------|------------------|------------------|------------------|----------------------------|------------------|------------------|------------------|------------------|
|                          | 1, N<br>=<br>400 | 2, N<br>=<br>399 | 3, N<br>=<br>399 | 4, N<br>=<br>399 | 5, N<br>=<br>399 | 1, N<br>=<br>400  | 2, N<br>=<br>399 | 3, N<br>=<br>399 | 4, N<br>=<br>399 | 5, N<br>=<br>399 | 1, N<br>=<br>400           | 2, N<br>=<br>399 | 3, N<br>=<br>399 | 4, N<br>=<br>399 | 5, N<br>=<br>399 |
| <b>Age (years)</b>       | 68<br>(58)       | 66<br>(54)       | 63<br>(51)       | 62<br>(53)       | 61<br>(53)       | 65<br>(54)        | 63<br>(49)       | 63<br>(52)       | 64<br>(56)       | 64<br>(57)       | 67<br>(55)                 | 64<br>(54)       | 64<br>(54)       | 63<br>(53)       | 63<br>(53)       |
|                          | -<br>(78)        | -<br>(72)        | -<br>(69)        | -<br>(69)        | -<br>(68)        | -<br>(75)         | -<br>(72)        | -<br>(70)        | -<br>(69)        | -<br>(69)        | -<br>(76)                  | -<br>(71)        | -<br>(70)        | -<br>(69)        | -<br>(69)        |
| <b>Menopausal Status</b> |                  |                  |                  |                  |                  |                   |                  |                  |                  |                  |                            |                  |                  |                  |                  |
| Pre-menopausal           | 56<br>(14)       | 73<br>(19)       | 90<br>(23)       | 79<br>(20)       | 67<br>(17)       | 76<br>(19)        | 106<br>(27)      | 83<br>(21)       | 63<br>(16)       | 37<br>(9.3)      | 67<br>(17)                 | 78<br>(20)       | 70<br>(18)       | 76<br>(19)       | 74<br>(19)       |
| Post-menopausal          | 325<br>(83)      | 302<br>(77)      | 292<br>(74)      | 298<br>(76)      | 307<br>(78)      | 305<br>(77)       | 267<br>(68)      | 293<br>(75)      | 316<br>(80)      | 343<br>(86)      | 304<br>(78)                | 298<br>(76)      | 311<br>(78)      | 303<br>(77)      | 308<br>(78)      |
| Uncertain                | 12<br>(3.1)      | 18<br>(4.6)      | 14<br>(3.5)      | 17<br>(4.3)      | 22<br>(5.6)      | 14<br>(3.5)       | 21<br>(5.3)      | 16<br>(4.1)      | 15<br>(3.8)      | 17<br>(4.3)      | 20<br>(5.1)                | 18<br>(4.6)      | 17<br>(4.3)      | 15<br>(3.8)      | 13<br>(3.3)      |
| <b>Laterality</b>        |                  |                  |                  |                  |                  |                   |                  |                  |                  |                  |                            |                  |                  |                  |                  |
| Left                     | 218<br>(55)      | 219<br>(55)      | 196<br>(49)      | 187<br>(47)      | 218<br>(55)      | 218<br>(55)       | 205<br>(51)      | 209<br>(52)      | 194<br>(49)      | 212<br>(53)      | 213<br>(53)                | 206<br>(52)      | 201<br>(50)      | 213<br>(53)      | 205<br>(51)      |
| Right                    | 182<br>(46)      | 180<br>(45)      | 203<br>(51)      | 212<br>(53)      | 181<br>(45)      | 182<br>(46)       | 194<br>(49)      | 190<br>(48)      | 205<br>(51)      | 187<br>(47)      | 187<br>(47)                | 193<br>(48)      | 198<br>(50)      | 186<br>(47)      | 194<br>(49)      |
| <b>Size (mm)</b>         | 17<br>(12)       | 16<br>(11)       | 16<br>(11)       | 15<br>(11)       | 16<br>(11)       | 17<br>(12)        | 15<br>(11)       | 15<br>(11)       | 16<br>(11)       | 16<br>(11)       | 17<br>(12)                 | 15<br>(11)       | 15<br>(11)       | 16<br>(11)       | 15<br>(11)       |
|                          | -<br>(25)        | -<br>(22)        | -<br>(22)        | -<br>(22)        | -<br>(22)        | -<br>(23)         | -<br>(22)        | -<br>(23)        | -<br>(22)        | -<br>(22)        | -<br>(24)                  | -<br>(22)        | -<br>(21)        | -<br>(23)        | -<br>(22)        |
| <b>Lymph Nodes</b>       |                  |                  |                  |                  |                  |                   |                  |                  |                  |                  |                            |                  |                  |                  |                  |
| >=4                      | 38<br>(10)       | 42<br>(11)       | 27<br>(7.0)      | 34<br>(8.9)      | 34<br>(8.8)      | 36<br>(9.4)       | 35<br>(9.2)      | 31<br>(7.9)      | 39<br>(10)       | 34<br>(8.9)      | 31<br>(8.0)                | 36<br>(9.4)      | 36<br>(9.5)      | 39<br>(10)       | 33<br>(8.6)      |
| 1-3                      | 91<br>(24)       | 88<br>(23)       | 97<br>(25)       | 89<br>(23)       | 96<br>(25)       | 95<br>(25)        | 86<br>(23)       | 109<br>(28)      | 76<br>(20)       | 95<br>(25)       | 97<br>(25)                 | 87<br>(23)       | 87<br>(23)       | 93<br>(24)       | 97<br>(25)       |
| No Involvement           | 243<br>(64)      | 249<br>(65)      | 254<br>(65)      | 247<br>(65)      | 247<br>(64)      | 243<br>(63)       | 253<br>(66)      | 245<br>(63)      | 257<br>(68)      | 242<br>(63)      | 249<br>(65)                | 254<br>(66)      | 245<br>(65)      | 246<br>(64)      | 246<br>(64)      |
| Submicrometastasis       | 8<br>(2.1)       | 6<br>(1.6)       | 10<br>(2.6)      | 10<br>(2.6)      | 8<br>(2.1)       | 9<br>(2.3)        | 8<br>(2.1)       | 5<br>(1.3)       | 8<br>(2.1)       | 12<br>(3.1)      | 9<br>(2.3)                 | 7<br>(1.8)       | 9<br>(2.4)       | 9<br>(2.3)       | 8<br>(2.1)       |
| (Missing)                | 20               | 14               | 11               | 19               | 14               | 17                | 17               | 9                | 19               | 16               | 14                         | 15               | 22               | 12               | 15               |
| <b>NHG</b>               |                  |                  |                  |                  |                  |                   |                  |                  |                  |                  |                            |                  |                  |                  |                  |
| I                        | 76<br>(20)       | 79<br>(20)       | 62<br>(16)       | 71<br>(18)       | 95<br>(24)       | 78<br>(21)        | 75<br>(19)       | 66<br>(17)       | 79<br>(20)       | 85<br>(22)       | 80<br>(21)                 | 73<br>(19)       | 76<br>(19)       | 74<br>(19)       | 80<br>(21)       |
| II                       | 176<br>(46)      | 188<br>(48)      | 189<br>(49)      | 184<br>(47)      | 181<br>(46)      | 178<br>(47)       | 160<br>(41)      | 196<br>(51)      | 198<br>(50)      | 186<br>(47)      | 180<br>(47)                | 192<br>(50)      | 186<br>(48)      | 185<br>(48)      | 175<br>(45)      |
| III                      | 130<br>(34)      | 121<br>(31)      | 138<br>(35)      | 135<br>(35)      | 114<br>(29)      | 123<br>(32)       | 151<br>(39)      | 126<br>(32)      | 117<br>(30)      | 121<br>(31)      | 123<br>(32)                | 122<br>(32)      | 129<br>(33)      | 130<br>(33)      | 134<br>(34)      |
| (Missing)                | 18               | 11               | 10               | 9                | 9                | 21                | 13               | 11               | 5                | 7                | 17                         | 12               | 8                | 10               | 10               |
| <b>Ki67 Expression</b>   |                  |                  |                  |                  |                  |                   |                  |                  |                  |                  |                            |                  |                  |                  |                  |
| Low                      | 44<br>(44)       | 40<br>(37)       | 48<br>(54)       | 45<br>(52)       | 49<br>(52)       | 44<br>(43)        | 43<br>(42)       | 45<br>(47)       | 48<br>(49)       | 46<br>(57)       | 51<br>(50)                 | 48<br>(53)       | 39<br>(43)       | 34<br>(37)       | 54<br>(54)       |
| High                     | 55<br>(56)       | 68<br>(63)       | 41<br>(46)       | 42<br>(48)       | 46<br>(48)       | 59<br>(57)        | 59<br>(58)       | 50<br>(53)       | 49<br>(51)       | 35<br>(43)       | 52<br>(50)                 | 43<br>(47)       | 52<br>(57)       | 59<br>(63)       | 46<br>(46)       |
| (Missing)                | 301              | 291              | 310              | 312              | 304              | 297               | 297              | 304              | 302              | 318              | 297                        | 308              | 308              | 306              | 299              |
| <b>Histological Type</b> |                  |                  |                  |                  |                  |                   |                  |                  |                  |                  |                            |                  |                  |                  |                  |
| Ductal                   | 317<br>(79)      | 330<br>(83)      | 311<br>(78)      | 313<br>(78)      | 326<br>(82)      | 313<br>(78)       | 327<br>(82)      | 325<br>(81)      | 315<br>(79)      | 317<br>(80)      | 330<br>(82)                | 306<br>(77)      | 324<br>(81)      | 311<br>(78)      | 326<br>(82)      |
| Lobular                  | 55<br>(14)       | 46<br>(12)       | 58<br>(15)       | 58<br>(15)       | 43<br>(11)       | 51<br>(13)        | 47<br>(12)       | 52<br>(13)       | 56<br>(14)       | 54<br>(14)       | 44<br>(11)                 | 56<br>(14)       | 49<br>(12)       | 60<br>(15)       | 51<br>(13)       |
| Other                    | 24<br>(6.0)      | 18<br>(4.5)      | 22<br>(5.5)      | 22<br>(5.5)      | 19<br>(4.8)      | 26<br>(6.5)       | 22<br>(5.5)      | 19<br>(4.8)      | 21<br>(5.3)      | 17<br>(4.3)      | 19<br>(4.8)                | 29<br>(7.3)      | 22<br>(5.5)      | 22<br>(5.5)      | 13<br>(3.3)      |
| Ductal+ Lobular/Other    | 4<br>(1.0)       | 4<br>(1.0)       | 8<br>(2.0)       | 6<br>(1.5)       | 10<br>(2.5)      | 10<br>(2.5)       | 2<br>(0.5)       | 3<br>(0.8)       | 7<br>(1.8)       | 10<br>(2.5)      | 7<br>(1.8)                 | 8<br>(2.0)       | 4<br>(1.0)       | 5<br>(1.3)       | 8<br>(2.0)       |
| <b>HER2 Positive</b>     | 59<br>(15)       | 40<br>(10)       | 57<br>(15)       | 47<br>(12)       | 45<br>(11)       | 50<br>(13)        | 53<br>(13)       | 49<br>(12)       | 48<br>(12)       | 48<br>(12)       | 47<br>(12)                 | 57<br>(14)       | 44<br>(11)       | 49<br>(12)       | 51<br>(13)       |
| <b>ER Positive</b>       | 325<br>(81)      | 345<br>(87)      | 345<br>(86)      | 339<br>(85)      | 356<br>(89)      | 334<br>(84)       | 334<br>(84)      | 349<br>(88)      | 341<br>(86)      | 352<br>(88)      | 341<br>(85)                | 347<br>(87)      | 340<br>(85)      | 342<br>(86)      | 340<br>(85)      |
| <b>PGR Positive</b>      | 267<br>(67)      | 290<br>(73)      | 289<br>(72)      | 287<br>(72)      | 301<br>(76)      | 279<br>(70)       | 289<br>(73)      | 295<br>(74)      | 285<br>(72)      | 286<br>(72)      | 283<br>(71)                | 290<br>(73)      | 288<br>(72)      | 284<br>(72)      | 289<br>(72)      |

Median (IQR); n (%)

**Supplementary Table 2** Adjusting the fully adjusted Cox regression models of Se, SELENOP and GPx3 quintiles for type of treatment one by one regarding overall survival.

| Characteristic                   | + Breast Surgery Method |              | + Axillary Surgery Method |              | + Endocrine Treatment |              | + Cytotoxic Treatment |              | + Immuno Treatment |              | + Radio Treatment |              |
|----------------------------------|-------------------------|--------------|---------------------------|--------------|-----------------------|--------------|-----------------------|--------------|--------------------|--------------|-------------------|--------------|
|                                  | HR                      | 95% CI       | HR                        | 95% CI       | HR                    | 95% CI       | HR                    | 95% CI       | HR                 | 95% CI       | HR                | 95% CI       |
| <b>Selenium Quintiles</b>        |                         |              |                           |              |                       |              |                       |              |                    |              |                   |              |
| 1                                | —                       | —            | —                         | —            | —                     | —            | —                     | —            | —                  | —            | —                 | —            |
| 2                                | 0.65                    | 0.47 to 0.88 | 0.62                      | 0.45 to 0.85 | 0.63                  | 0.46 to 0.87 | 0.63                  | 0.46 to 0.87 | 0.63               | 0.46 to 0.87 | 0.66              | 0.48 to 0.90 |
| 3                                | 0.54                    | 0.39 to 0.75 | 0.52                      | 0.37 to 0.73 | 0.53                  | 0.38 to 0.74 | 0.54                  | 0.38 to 0.75 | 0.54               | 0.39 to 0.75 | 0.54              | 0.39 to 0.75 |
| 4                                | 0.48                    | 0.33 to 0.68 | 0.47                      | 0.33 to 0.67 | 0.47                  | 0.33 to 0.67 | 0.47                  | 0.33 to 0.67 | 0.47               | 0.33 to 0.68 | 0.48              | 0.34 to 0.69 |
| 5                                | 0.44                    | 0.29 to 0.65 | 0.42                      | 0.28 to 0.63 | 0.42                  | 0.28 to 0.63 | 0.43                  | 0.29 to 0.64 | 0.43               | 0.29 to 0.64 | 0.44              | 0.29 to 0.66 |
| <b>Selenoprotein P Quintiles</b> |                         |              |                           |              |                       |              |                       |              |                    |              |                   |              |
| 1                                | —                       | —            | —                         | —            | —                     | —            | —                     | —            | —                  | —            | —                 | —            |
| 2                                | 0.54                    | 0.39 to 0.75 | 0.55                      | 0.39 to 0.77 | 0.54                  | 0.39 to 0.76 | 0.54                  | 0.39 to 0.76 | 0.53               | 0.38 to 0.75 | 0.54              | 0.39 to 0.76 |
| 3                                | 0.60                    | 0.43 to 0.83 | 0.60                      | 0.43 to 0.83 | 0.60                  | 0.43 to 0.83 | 0.59                  | 0.43 to 0.82 | 0.60               | 0.44 to 0.84 | 0.61              | 0.44 to 0.85 |
| 4                                | 0.47                    | 0.33 to 0.67 | 0.46                      | 0.32 to 0.66 | 0.46                  | 0.32 to 0.66 | 0.46                  | 0.32 to 0.66 | 0.45               | 0.31 to 0.64 | 0.47              | 0.33 to 0.68 |
| 5                                | 0.51                    | 0.36 to 0.73 | 0.51                      | 0.36 to 0.74 | 0.51                  | 0.36 to 0.73 | 0.52                  | 0.36 to 0.74 | 0.52               | 0.36 to 0.74 | 0.53              | 0.37 to 0.75 |
| <b>GPx3 Quintiles</b>            |                         |              |                           |              |                       |              |                       |              |                    |              |                   |              |
| 1                                | —                       | —            | —                         | —            | —                     | —            | —                     | —            | —                  | —            | —                 | —            |
| 2                                | 0.76                    | 0.56 to 1.03 | 0.79                      | 0.58 to 1.07 | 0.76                  | 0.56 to 1.03 | 0.76                  | 0.56 to 1.03 | 0.77               | 0.57 to 1.05 | 0.78              | 0.58 to 1.06 |
| 3                                | 0.45                    | 0.31 to 0.65 | 0.42                      | 0.29 to 0.62 | 0.43                  | 0.30 to 0.63 | 0.44                  | 0.30 to 0.63 | 0.43               | 0.30 to 0.62 | 0.45              | 0.31 to 0.65 |
| 4                                | 0.59                    | 0.42 to 0.84 | 0.60                      | 0.42 to 0.85 | 0.59                  | 0.42 to 0.84 | 0.60                  | 0.42 to 0.85 | 0.61               | 0.43 to 0.86 | 0.60              | 0.42 to 0.85 |
| 5                                | 0.53                    | 0.37 to 0.76 | 0.53                      | 0.37 to 0.77 | 0.52                  | 0.36 to 0.75 | 0.52                  | 0.36 to 0.74 | 0.52               | 0.36 to 0.75 | 0.53              | 0.37 to 0.76 |

HR = Hazard Ratio, CI = Confidence Interval

Fully Adjusted Model, N=1996. Missing values in adjustment factors were imputed via multiple imputation. Model includes Age, Menopausal Status, ER Expression, PGR Expression, HER2 Expression, Nottingham Histologic Grade, Histologic Type, Number of Lymph Nodes involved, Mode of Diagnosis, Tumour Size [mm] + Treatment options.

**Supplementary Table 3** Adjusting the fully adjusted Cox regression models of Se, SELENOP and GPx3 quintiles for type of treatment one by one regarding recurrence free survival.

| Characteristic                   | + Breast Surgery Type |              | + Axillary Surgery Type |              | + Endocrine Treatment |              | + Cytotoxic Treatment |              | + Immuno Treatment |              | + Radio Treatment |              |
|----------------------------------|-----------------------|--------------|-------------------------|--------------|-----------------------|--------------|-----------------------|--------------|--------------------|--------------|-------------------|--------------|
|                                  | HR                    | 95% CI       | HR                      | 95% CI       | HR                    | 95% CI       | HR                    | 95% CI       | HR                 | 95% CI       | HR                | 95% CI       |
| <b>Selenium Quintiles</b>        |                       |              |                         |              |                       |              |                       |              |                    |              |                   |              |
| 1                                | —                     | —            | —                       | —            | —                     | —            | —                     | —            | —                  | —            | —                 | —            |
| 2                                | 0.88                  | 0.56 to 1.38 | 0.86                    | 0.55 to 1.36 | 0.88                  | 0.56 to 1.39 | 0.87                  | 0.55 to 1.37 | 0.88               | 0.56 to 1.38 | 0.88              | 0.56 to 1.38 |
| 3                                | 0.68                  | 0.42 to 1.11 | 0.66                    | 0.41 to 1.07 | 0.67                  | 0.41 to 1.08 | 0.68                  | 0.42 to 1.11 | 0.70               | 0.43 to 1.14 | 0.68              | 0.42 to 1.09 |
| 4                                | 0.64                  | 0.39 to 1.05 | 0.65                    | 0.40 to 1.07 | 0.65                  | 0.40 to 1.06 | 0.64                  | 0.39 to 1.05 | 0.64               | 0.39 to 1.06 | 0.64              | 0.39 to 1.04 |
| 5                                | 0.87                  | 0.54 to 1.41 | 0.88                    | 0.55 to 1.43 | 0.86                  | 0.53 to 1.39 | 0.89                  | 0.55 to 1.44 | 0.88               | 0.54 to 1.42 | 0.87              | 0.54 to 1.40 |
| <b>Selenoprotein P Quintiles</b> |                       |              |                         |              |                       |              |                       |              |                    |              |                   |              |
| 1                                | —                     | —            | —                       | —            | —                     | —            | —                     | —            | —                  | —            | —                 | —            |
| 2                                | 1.15                  | 0.73 to 1.80 | 1.16                    | 0.74 to 1.83 | 1.19                  | 0.75 to 1.87 | 1.15                  | 0.73 to 1.80 | 1.14               | 0.73 to 1.79 | 1.15              | 0.73 to 1.81 |
| 3                                | 0.93                  | 0.58 to 1.50 | 0.94                    | 0.59 to 1.52 | 0.92                  | 0.57 to 1.48 | 0.91                  | 0.57 to 1.46 | 0.95               | 0.59 to 1.53 | 0.94              | 0.58 to 1.51 |
| 4                                | 0.73                  | 0.44 to 1.22 | 0.74                    | 0.44 to 1.23 | 0.73                  | 0.44 to 1.21 | 0.72                  | 0.43 to 1.20 | 0.71               | 0.42 to 1.18 | 0.72              | 0.43 to 1.21 |
| 5                                | 0.80                  | 0.48 to 1.33 | 0.80                    | 0.48 to 1.34 | 0.81                  | 0.48 to 1.35 | 0.81                  | 0.48 to 1.35 | 0.82               | 0.49 to 1.36 | 0.80              | 0.48 to 1.33 |
| <b>GPx3 Quintiles</b>            |                       |              |                         |              |                       |              |                       |              |                    |              |                   |              |
| 1                                | —                     | —            | —                       | —            | —                     | —            | —                     | —            | —                  | —            | —                 | —            |
| 2                                | 0.71                  | 0.46 to 1.12 | 0.74                    | 0.47 to 1.15 | 0.71                  | 0.45 to 1.11 | 0.71                  | 0.45 to 1.11 | 0.73               | 0.47 to 1.14 | 0.72              | 0.46 to 1.13 |
| 3                                | 0.68                  | 0.43 to 1.08 | 0.65                    | 0.41 to 1.04 | 0.63                  | 0.40 to 1.00 | 0.68                  | 0.43 to 1.08 | 0.65               | 0.41 to 1.03 | 0.67              | 0.42 to 1.06 |
| 4                                | 0.48                  | 0.29 to 0.79 | 0.49                    | 0.30 to 0.81 | 0.48                  | 0.29 to 0.79 | 0.50                  | 0.30 to 0.82 | 0.50               | 0.30 to 0.82 | 0.48              | 0.29 to 0.79 |
| 5                                | 0.58                  | 0.36 to 0.94 | 0.59                    | 0.36 to 0.95 | 0.57                  | 0.35 to 0.93 | 0.57                  | 0.35 to 0.93 | 0.57               | 0.35 to 0.92 | 0.58              | 0.36 to 0.93 |

HR = Hazard Ratio, CI = Confidence Interval

Fully Adjusted Model, N=1996. Missing values in adjustment factors were imputed via multiple imputation. Model includes Age, Menopausal Status, ER Expression, PGR Expression, HER2 Expression, Nottingham Histologic Grade, Histologic Type, Number of Lymph Nodes involved, Mode of Diagnosis, Tumour Size [mm] + Treatment options.

**Supplementary Table 4** Overall survival with complete cases.

| Characteristic                  | At Risk | Death | Univariate <sup>a</sup> |              | Age Adjusted <sup>b</sup> |              | Fully Adjusted <sup>c</sup> |              |
|---------------------------------|---------|-------|-------------------------|--------------|---------------------------|--------------|-----------------------------|--------------|
|                                 | N       | N     | HR                      | 95% CI       | HR                        | 95% CI       | HR                          | 95% CI       |
| <b>Selenium Quintiles</b>       |         |       |                         |              |                           |              |                             |              |
| 1                               | 400     | 119   | —                       | —            | —                         | —            | —                           | —            |
| 2                               | 399     | 62    | 0.48                    | 0.35 to 0.65 | 0.59                      | 0.44 to 0.81 | 0.70                        | 0.50 to 0.98 |
| 3                               | 399     | 53    | 0.40                    | 0.29 to 0.55 | 0.53                      | 0.38 to 0.74 | 0.54                        | 0.38 to 0.76 |
| 4                               | 399     | 43    | 0.32                    | 0.22 to 0.45 | 0.46                      | 0.32 to 0.66 | 0.43                        | 0.29 to 0.63 |
| 5                               | 399     | 33    | 0.24                    | 0.17 to 0.36 | 0.37                      | 0.25 to 0.55 | 0.42                        | 0.27 to 0.65 |
| <b>Total</b>                    | 1,996   | 310   |                         |              |                           |              |                             |              |
| <b>Selenium per SD increase</b> |         |       | 0.59                    | 0.52 to 0.66 | 0.71                      | 0.63 to 0.81 | 0.70                        | 0.61 to 0.80 |
| <b>SELENOP Quintiles</b>        |         |       |                         |              |                           |              |                             |              |
| 1                               | 400     | 106   | —                       | —            | —                         | —            | —                           | —            |
| 2                               | 399     | 55    | 0.47                    | 0.34 to 0.65 | 0.53                      | 0.38 to 0.73 | 0.54                        | 0.38 to 0.77 |
| 3                               | 399     | 60    | 0.51                    | 0.37 to 0.70 | 0.61                      | 0.44 to 0.83 | 0.60                        | 0.42 to 0.85 |
| 4                               | 399     | 43    | 0.36                    | 0.26 to 0.52 | 0.42                      | 0.30 to 0.61 | 0.59                        | 0.41 to 0.84 |
| 5                               | 399     | 46    | 0.39                    | 0.27 to 0.55 | 0.46                      | 0.32 to 0.65 | 0.44                        | 0.29 to 0.65 |
| <b>Total</b>                    | 1,996   | 310   |                         |              |                           |              |                             |              |
| <b>SELENOP per SD increase</b>  |         |       | 0.65                    | 0.58 to 0.73 | 0.71                      | 0.63 to 0.80 | 0.75                        | 0.66 to 0.85 |
| <b>GPx3 Quintiles</b>           |         |       |                         |              |                           |              |                             |              |
| 1                               | 400     | 105   | —                       | —            | —                         | —            | —                           | —            |
| 2                               | 399     | 72    | 0.64                    | 0.48 to 0.87 | 0.80                      | 0.59 to 1.08 | 0.77                        | 0.56 to 1.07 |
| 3                               | 399     | 40    | 0.34                    | 0.24 to 0.49 | 0.45                      | 0.31 to 0.65 | 0.47                        | 0.32 to 0.70 |
| 4                               | 399     | 50    | 0.44                    | 0.31 to 0.61 | 0.60                      | 0.43 to 0.85 | 0.59                        | 0.40 to 0.87 |
| 5                               | 399     | 43    | 0.37                    | 0.26 to 0.53 | 0.53                      | 0.37 to 0.76 | 0.53                        | 0.36 to 0.78 |
| <b>Total</b>                    | 1,996   | 310   |                         |              |                           |              |                             |              |
| <b>GPx3 per SD increase</b>     |         |       | 0.65                    | 0.58 to 0.73 | 0.76                      | 0.68 to 0.85 | 0.76                        | 0.67 to 0.86 |

HR = hazard ratio, CI = confidence interval

<sup>a</sup> Crude model, N=1996. No missing values.

<sup>b</sup> Age adjusted model, N=1996. No missing values. Adjusted for age at diagnosis of breast cancer.

<sup>c</sup> Fully Adjusted Model, N=1798.

**Supplementary Table 5** Recurrence free survival with complete cases.

| Characteristic                  | At Risk      | Recurrence | Univariate <sup>a</sup> |                     | Age Adjusted <sup>b</sup> |                     | Fully Adjusted <sup>c</sup> |                     |
|---------------------------------|--------------|------------|-------------------------|---------------------|---------------------------|---------------------|-----------------------------|---------------------|
|                                 | N            | N          | HR                      | 95% CI              | HR                        | 95% CI              | HR                          | 95% CI              |
| <b>Selenium Quintiles</b>       |              |            |                         |                     |                           |                     |                             |                     |
| 1                               | 400          | 43         | —                       | —                   | —                         | —                   | —                           | —                   |
| 2                               | 399          | 36         | 0.78                    | 0.50 to 1.22        | 0.80                      | 0.52 to 1.25        | 0.93                        | 0.57 to 1.51        |
| 3                               | 399          | 29         | 0.61                    | 0.38 to 0.98        | 0.64                      | 0.40 to 1.02        | 0.66                        | 0.40 to 1.11        |
| 4                               | 399          | 27         | 0.56                    | 0.35 to 0.91        | 0.59                      | 0.36 to 0.96        | 0.64                        | 0.38 to 1.08        |
| 5                               | 399          | 32         | 0.67                    | 0.42 to 1.05        | 0.70                      | 0.44 to 1.11        | 0.87                        | 0.52 to 1.46        |
| <b>Total</b>                    | <b>1,996</b> | <b>167</b> |                         |                     |                           |                     |                             |                     |
| <b>Selenium per SD increase</b> |              |            | <b>0.90</b>             | <b>0.77 to 1.06</b> | <b>0.92</b>               | <b>0.78 to 1.08</b> | <b>0.95</b>                 | <b>0.80 to 1.13</b> |
| <b>SELENOP Quintiles</b>        |              |            |                         |                     |                           |                     |                             |                     |
| 1                               | 400          | 37         | —                       | —                   | —                         | —                   | —                           | —                   |
| 2                               | 399          | 43         | 1.10                    | 0.71 to 1.71        | 1.13                      | 0.73 to 1.75        | 1.25                        | 0.78 to 2.01        |
| 3                               | 399          | 34         | 0.84                    | 0.53 to 1.35        | 0.87                      | 0.54 to 1.38        | 0.88                        | 0.52 to 1.48        |
| 4                               | 399          | 26         | 0.65                    | 0.39 to 1.07        | 0.66                      | 0.40 to 1.08        | 0.89                        | 0.53 to 1.51        |
| 5                               | 399          | 27         | 0.67                    | 0.41 to 1.10        | 0.67                      | 0.41 to 1.11        | 0.75                        | 0.43 to 1.31        |
| <b>Total</b>                    | <b>1,996</b> | <b>167</b> |                         |                     |                           |                     |                             |                     |
| <b>SELENOP per SD increase</b>  |              |            | <b>0.84</b>             | <b>0.71 to 0.99</b> | <b>0.84</b>               | <b>0.71 to 1.00</b> | <b>0.89</b>                 | <b>0.75 to 1.05</b> |
| <b>GPx3 Quintiles</b>           |              |            |                         |                     |                           |                     |                             |                     |
| 1                               | 400          | 47         | —                       | —                   | —                         | —                   | —                           | —                   |
| 2                               | 399          | 35         | 0.71                    | 0.46 to 1.09        | 0.73                      | 0.47 to 1.13        | 0.69                        | 0.43 to 1.11        |
| 3                               | 399          | 32         | 0.62                    | 0.40 to 0.98        | 0.64                      | 0.41 to 1.01        | 0.69                        | 0.43 to 1.12        |
| 4                               | 399          | 25         | 0.49                    | 0.30 to 0.80        | 0.51                      | 0.31 to 0.83        | 0.42                        | 0.24 to 0.72        |
| 5                               | 399          | 28         | 0.55                    | 0.34 to 0.88        | 0.57                      | 0.35 to 0.91        | 0.59                        | 0.35 to 0.97        |
| <b>Total</b>                    | <b>1,996</b> | <b>167</b> |                         |                     |                           |                     |                             |                     |
| <b>GPx3 per SD increase</b>     |              |            | <b>0.81</b>             | <b>0.68 to 0.95</b> | <b>0.83</b>               | <b>0.70 to 0.98</b> | <b>0.83</b>                 | <b>0.70 to 0.98</b> |

HR = hazard ratio, CI = confidence interval

<sup>a</sup> Crude model, N=1996. No missing values.

<sup>b</sup> Age adjusted model, N=1996. No missing values. Adjusted for age at diagnosis of breast cancer.

<sup>c</sup> Fully Adjusted Model, N=1798.

**Supplementary Table 6** Overall and recurrence free survival excluding male breast cancer cases.

| Characteristic                  | Overall Survival <sup>a</sup> |                   | Recurrence Free Survival <sup>a</sup> |                   |
|---------------------------------|-------------------------------|-------------------|---------------------------------------|-------------------|
|                                 | HR                            | 95% CI            | HR                                    | 95% CI            |
| <b>Selenium Quintiles</b>       |                               |                   |                                       |                   |
| 1                               | —                             | —                 | —                                     | —                 |
| 2                               | 0.63                          | 0.46, 0.87        | 0.86                                  | 0.55, 1.36        |
| 3                               | 0.53                          | 0.38, 0.75        | 0.67                                  | 0.41, 1.08        |
| 4                               | 0.47                          | 0.32, 0.67        | 0.62                                  | 0.38, 1.02        |
| 5                               | 0.41                          | 0.28, 0.62        | 0.85                                  | 0.53, 1.37        |
| <b>Selenium per SD increase</b> | <b>0.71</b>                   | <b>0.63, 0.81</b> | <b>0.96</b>                           | <b>0.82, 1.13</b> |
| <b>SELENOP Quintiles</b>        |                               |                   |                                       |                   |
| 1                               | —                             | —                 | —                                     | —                 |
| 2                               | 0.55                          | 0.40, 0.77        | 1.16                                  | 0.74, 1.82        |
| 3                               | 0.60                          | 0.43, 0.84        | 0.93                                  | 0.58, 1.50        |
| 4                               | 0.46                          | 0.32, 0.67        | 0.71                                  | 0.43, 1.19        |
| 5                               | 0.51                          | 0.35, 0.73        | 0.79                                  | 0.47, 1.32        |
| <b>SELENOP per SD increase</b>  | <b>0.74</b>                   | <b>0.65, 0.83</b> | <b>0.85</b>                           | <b>0.72, 1.00</b> |
| <b>GPx3 Quintiles</b>           |                               |                   |                                       |                   |
| 1                               | —                             | —                 | —                                     | —                 |
| 2                               | 0.74                          | 0.54, 1.01        | 0.71                                  | 0.45, 1.11        |
| 3                               | 0.43                          | 0.30, 0.62        | 0.64                                  | 0.41, 1.02        |
| 4                               | 0.59                          | 0.42, 0.84        | 0.47                                  | 0.29, 0.78        |
| 5                               | 0.51                          | 0.36, 0.74        | 0.56                                  | 0.35, 0.91        |
| <b>GPx3 per SD increase</b>     | <b>0.75</b>                   | <b>0.66, 0.84</b> | <b>0.82</b>                           | <b>0.70, 0.96</b> |

HR = Hazard Ratio, CI = Confidence Interval

<sup>a</sup> Fully Adjusted Model, N=1988. 8 male breast cancer cases excluded. Missing values in adjustment factors were imputed via multiple imputation. Model includes Age, Menopausal Status, Mode of Diagnosis, ER Expression, PGR Expression, HER2 Expression, Nottingham Histologic Grade, Histologic Type, Number of Lymph Nodes involved, and Tumour Size [mm]

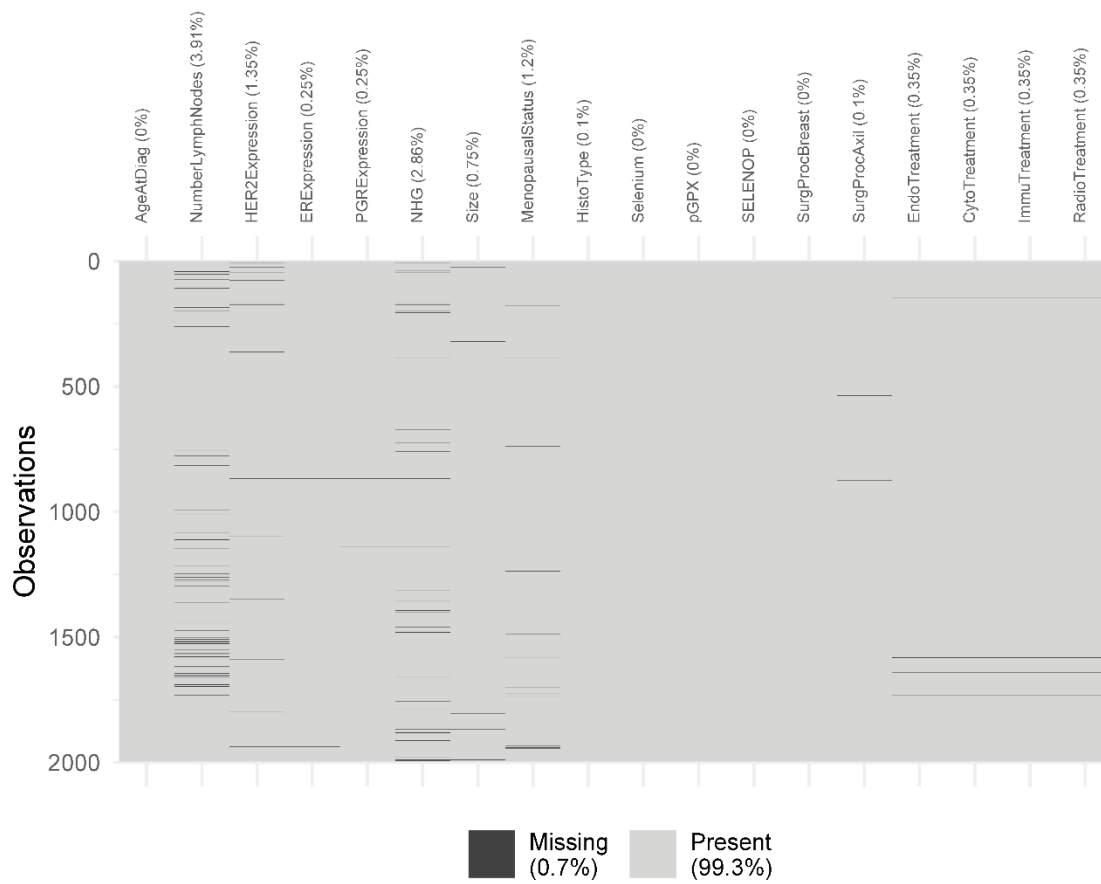

**Supplementary Fig 1. Missing data among the variables included in the analyses.**
